# Supplementary material for: Cell-targeted PD-1 agonists that mimic PD-L1 are potent T cell inhibitors
Source: JCI journal article supplement (doi:10.1172/jci.insight.152468), 2021-09-07
Supplement: sd1 [file 1]

You are being redirected.
